# Supplementary material
Source: publisher figshare collection journal article supplement (https://acs.figshare.com/ndownloader/files/21387267)
Supplement: Supplementary file 1 [file 21387267]

## Supporting Information

### Modular Total Synthesis in Reticular Chemistry

Liang Feng<sup>†</sup>, Kun-Yu Wang<sup>†</sup>, Xiu-Liang Lv<sup>†,‡</sup>, Tian-Hao Yan<sup>†</sup>, Jian-Rong Li<sup>‡</sup>, and Hong-Cai Zhou<sup>†,‡,\*</sup>

<sup>†</sup> Department of Chemistry, Texas A&M University, College Station, Texas 77843-3255, United States

<sup>‡</sup> Beijing Key Laboratory for Green Catalysis and Separation and Department of Chemistry and Chemical Engineering, College of Environmental and Energy Engineering, Beijing University of Technology, Beijing 100124, P. R. China

<sup>‡</sup> Department of Materials Science and Engineering, Texas A&M University, College Station, Texas 77843-3003, United States

\*To whom correspondence should be addressed.

E-mail: zhou@chem.tamu.edu

Tel: +1 (979) 845-4034; Fax: +1 (979) 845-1595

## Materials and Instrumentation

All reagents and solvents were commercially available and used as received.

**N<sub>2</sub> sorption isotherms.** Gas sorption measurements were conducted using a Micromeritics ASAP 2020 system. Prior to gas sorption measurements, about 50-100 mg samples were washed thoroughly with fresh DMF and exchanged by chloroform for 3 times, during which the solvent was decanted and freshly replenished three times every day. The solvent was then removed under vacuum at 85 °C for 12 h, yielding porous material.

**Powder X-ray diffraction (PXRD).** PXRD was carried out with a Bruker D8-Focus Bragg-Brentano X-ray Powder Diffractometer equipped with a Cu sealed tube ( $\lambda = 1.54178 \text{ \AA}$ ) at 40 kV and 40 mA.

**<sup>1</sup>H NMR spectroscopy.** Nuclear magnetic resonance (NMR) data were collected on an Inova 500 spectrometer.

**Scanning electron microscopy (SEM).** Images and analyses of SEM/EDX were taken by FEI Quanta 600 FE-SEM. The Quanta 600 FEG is a field emission scanning electron microscope capable of generating and collecting high-resolution and low-vacuum images. It is equipped with a motorized x-y-z-tilt-rotate stage, providing the following movements: x = y = 150 mm (motorized); z = 65 mm (motorized); Tilt +70 degrees to -5 degrees (motorized); Source: Field emission gun assembly with Schottky emitter source. Voltage: 200 V to 30 kV. Beam Current: >100 nA.

## Synthesis and Characterization

**Crystallization of single-crystalline COF-303.** COF-303 was synthesized on the basis of a previous report.<sup>1</sup> A vial was charged with tetrakis(4-formylphenyl)methane (TFM, 10.8 mg, 0.025 mmol), aniline (0.12 mL, 52 equiv.), and 0.25 mL of 1,4-dioxane, then 0.1 mL of aqueous acetic acid (6 M) was added to the solution. Phenylenediamine (PDA, 5.4 mg, 0.05 mmol) dissolved in 1,4-dioxane (0.25 mL) was then added. Then the mixture was allowed to further stand at ambient temperature. The single crystals of COF-303 then slowly crystallized out at ambient temperature and the crystal size reached  $\sim 15\ \mu\text{m}$  in 15 days.

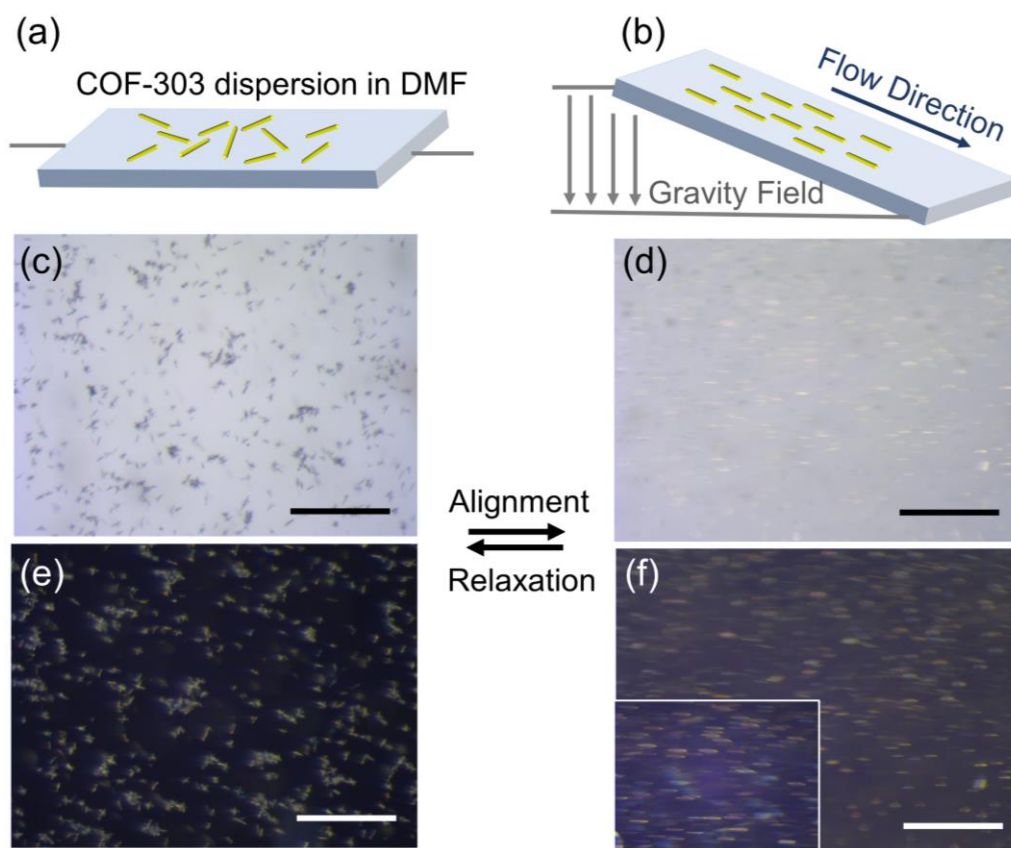

**Figure S1. Gravitational field alignment of COF microrods.** (a-b) Illustration of the reversible alignment and relaxation of COF-303 microrods in a DMF flow when exposed to a gravitational field. (c, e) Optical image and the corresponding polarized optical images of COF-303 microrods dispersed in a DMF solution. (d, f) Optical image and the corresponding polarized optical images of well-aligned COF-303 microrods in a DMF flow when the sample was inclined. Scale bar is  $100\ \mu\text{m}$  in (c-f).

**Stability test of single-crystalline COF-303.** About 5 mg COF-303 crystals were immersed into various solvent environments for 24 h, including organic solvents and aqueous solutions with varying pH values.

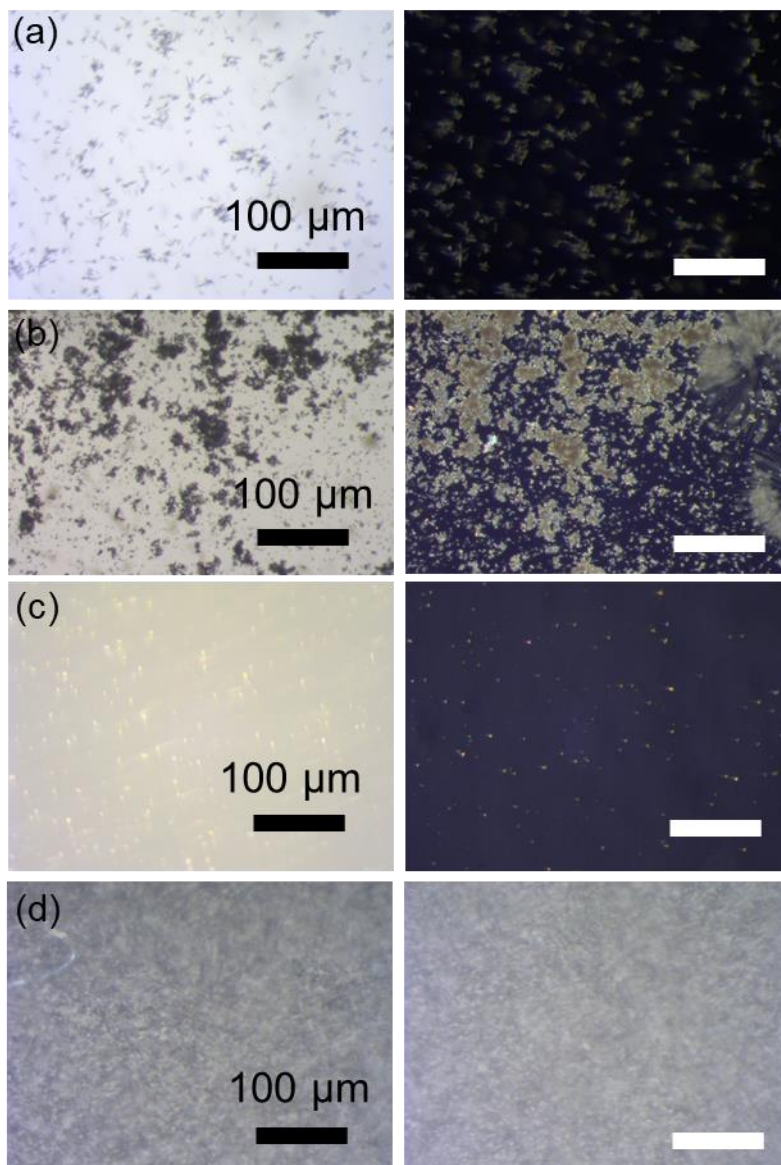

**Figure S2.** Optical images showing stability of COF-303 in various solvent environments for 24 h: (a) DMF; (b) pH = 7 aqueous solution; (c) pH = 1 aqueous solution; (d) UiO-67 precursor solutions. The COF-303 constructed from covalent bonds was robust enough to maintain the structural integrity under these harsh conditions.

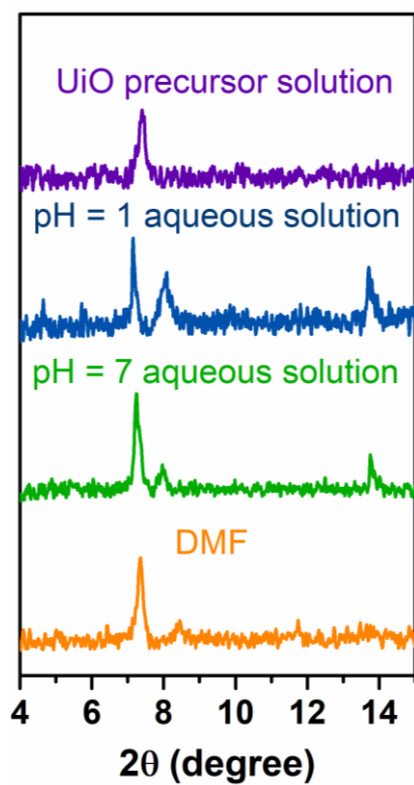

**Figure S3.** PXRD patterns showing high stability of COF-303 in various solvent environments for 24 h: DMF; pH = 7 aqueous solution; pH = 1 aqueous solution; and UiO-67 precursor solutions.

**Synthesis of MOF-5.** MOF-5 was synthesized on the basis of previous reports with slight modifications.<sup>2</sup>  $\text{Zn}(\text{NO}_3)_2 \cdot 6\text{H}_2\text{O}$  (41.6 mg), BDC (8.8 mg) and DEF (2 mL) were charged in a Pyrex vial. The mixture was heated in an 85 °C oven for 24 h to generate the cubic crystals of MOF-5. The crystals of MOF-5 were collected by centrifugation and washed with fresh DMF for 3 times. Synthesis of MOF-5 under 100 °C also generates similar cubic crystals.

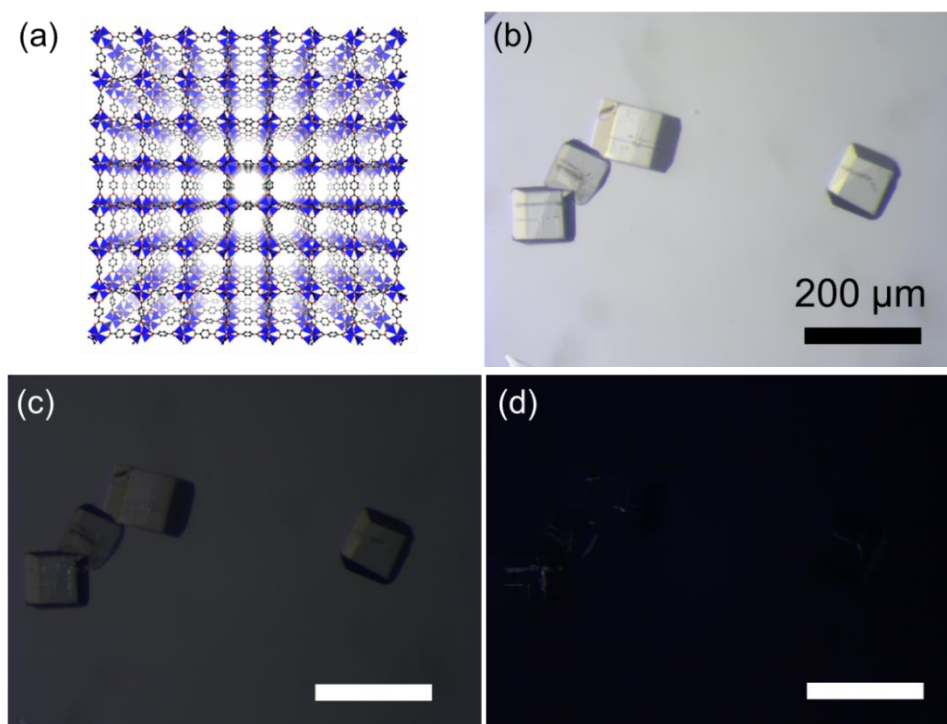

**Figure S4.** (a) The structure, (b) optical image and (c-d) the corresponding polarized optical images of MOF-5 crystals.

**Synthesis of COF-303@MOF-5.** COF-303 (1, 3 or 5 mg, respectively), H<sub>2</sub>BDC (8.8 mg), Zn(NO<sub>3</sub>)<sub>2</sub>·6H<sub>2</sub>O (41.6 mg) and DEF (2 mL) were charged in a Pyrex vial. The mixture was heated in an 85 °C oven for 24 h to generate the crystals of COF-303@MOF-5. The crystals were collected by centrifugation and washed with fresh DMF for 3 times. Various amounts of COF-303 can be immobilized into MOF-5 by tuning the initial amount during modular synthesis.

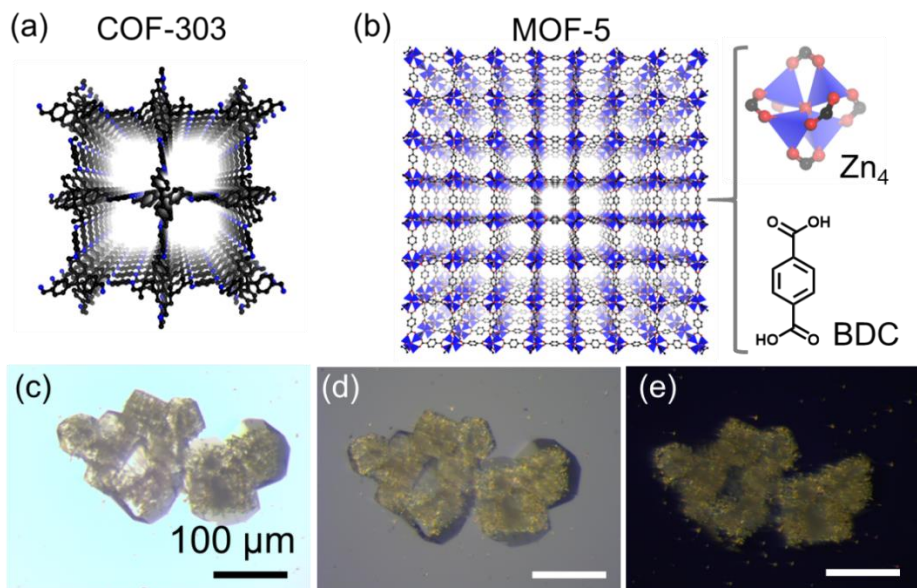

**Figure S5.** (a) The structure of COF-303 and (b) MOF-5, (c-e) optical images and the corresponding polarized optical images of COF-303@MOF-5 crystals.



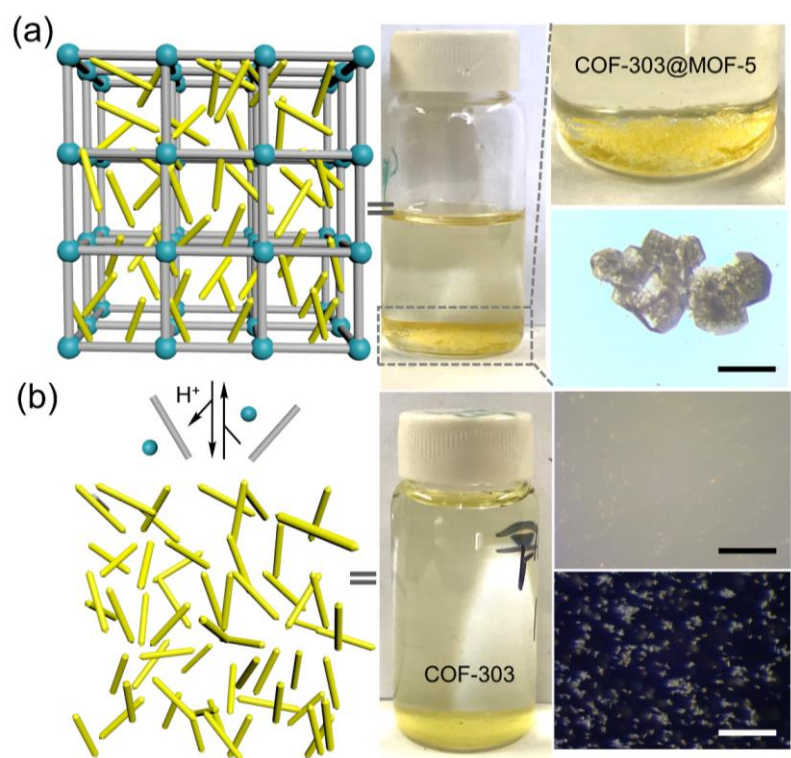

**Figure S6.** Optical image and the corresponding polarized optical images of COF-303@MOF-5 crystals (a) before and (b) after acid treatment. Scale bar is 100  $\mu\text{m}$ .



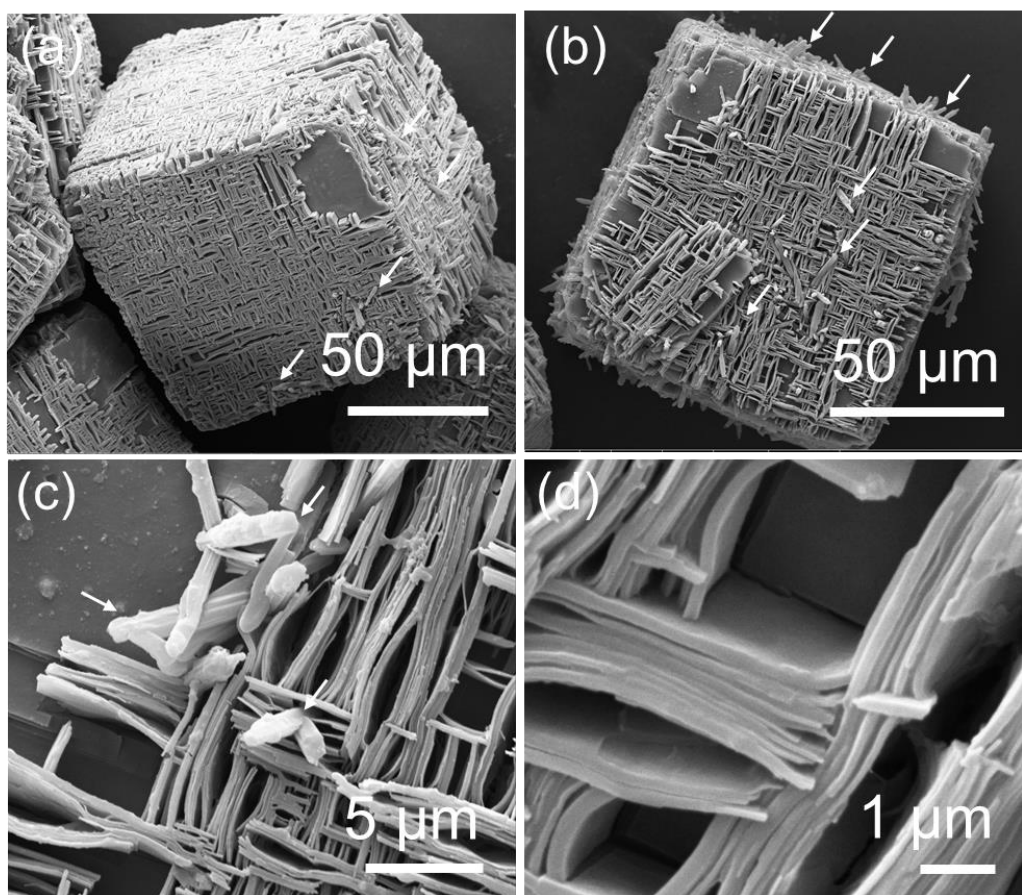

**Figure S7.** SEM images of the hierarchical COF-303@MOF-5 crystals: (a-b) the crystal of COF-303@MOF-5; (c-d) lamellar surface structures of COF-303@MOF-5. The white arrows indicate the positions of COF-303 microrods.

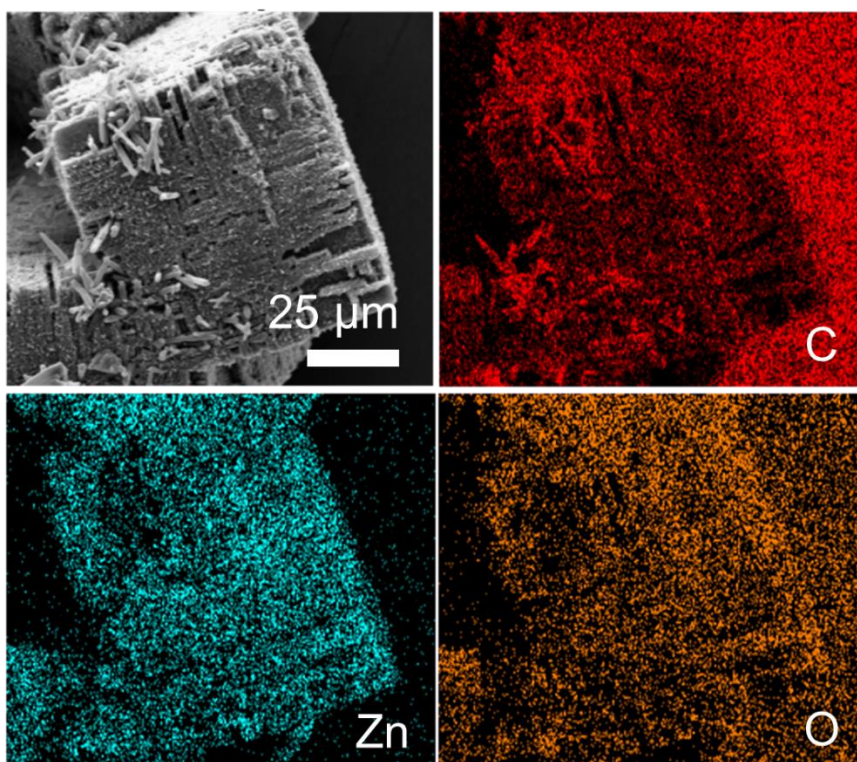

**Figure S8.** SEM images and EDS element mapping of COF-303@MOF-5 surfaces.

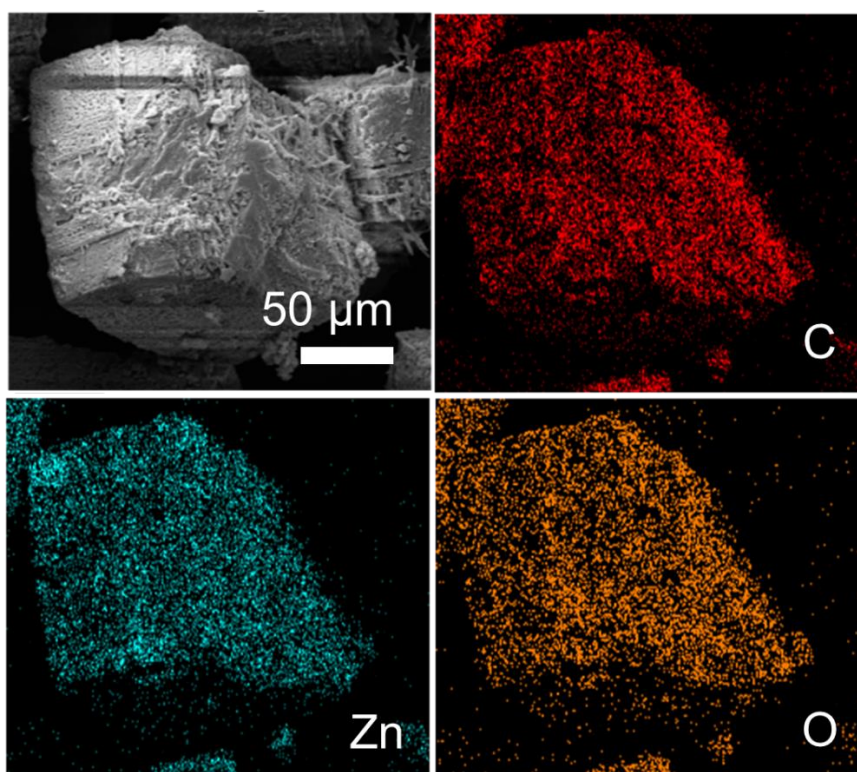

**Figure S9.** SEM images and EDS element mapping of a cracked COF-303@MOF-5 crystal showing the internal hierarchical structure.

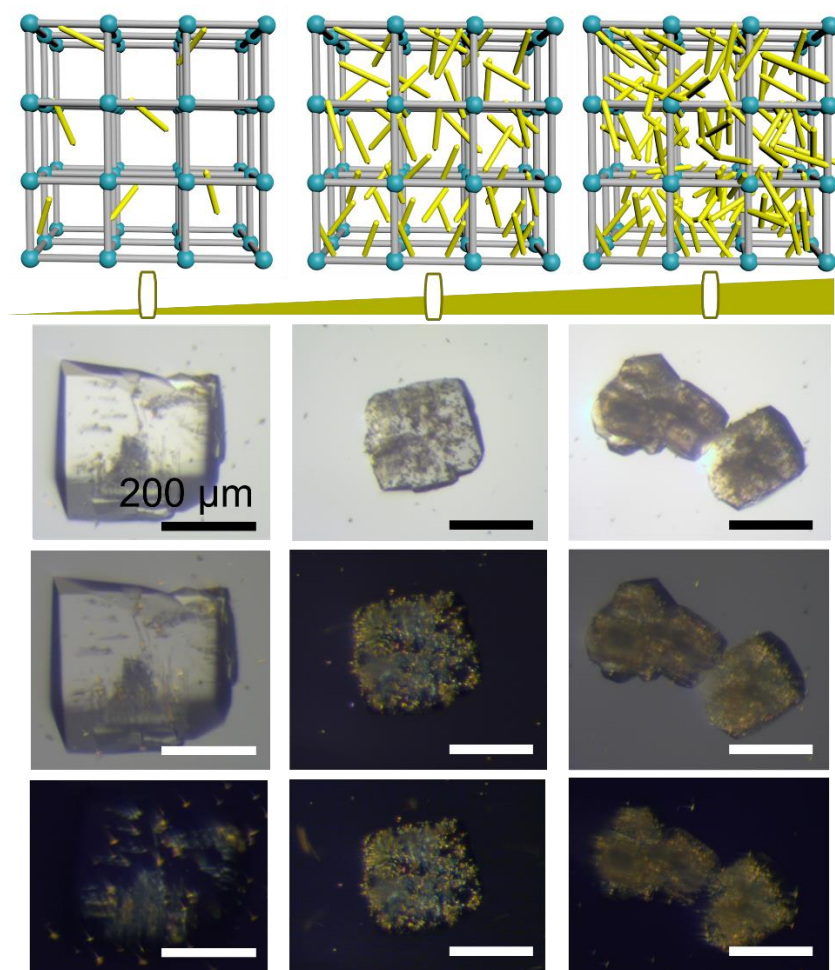

**Figure S10.** Various amounts of COF-303 can be immobilized into MOF-5 through modular synthesis. The corresponding polarized optical images placed in between crossed polarizers are also provided to visualize the apportion of COF microrods.

**Table S1.** Porosity parameter of COF-303@MOF-5, COF-303 and MOF-5.

| Compounds     | $S_{\text{BET}}^{\text{a}}$ ( $\text{m}^2\text{g}^{-1}$ ) | $V_{\text{t}}^{\text{b}}$ ( $\text{cm}^3\text{g}^{-1}$ ) | $\text{N}_2$ uptake ( $\text{cm}^3\text{g}^{-1}$ ) |
|---------------|-----------------------------------------------------------|----------------------------------------------------------|----------------------------------------------------|
| COF-303@MOF-5 | 2682                                                      | 1.033                                                    | 667.6                                              |
| COF-303       | 1487                                                      | 0.648                                                    | 418.8                                              |
| MOF-5         | 3418                                                      | 1.344                                                    | 868.8                                              |

$S_{\text{BET}}^{\text{a}}$ : Brunauer-Emmett-Teller (BET) specific surface area;  $V_{\text{t}}^{\text{b}}$ : total specific pore volume determined by using the adsorption branch of the  $\text{N}_2$  isotherm at  $P/P_0 = 0.95$ .

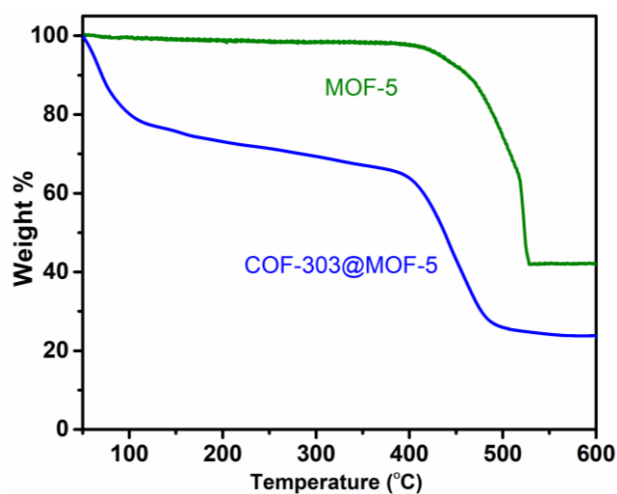

**Figure S11.** Thermogravimetric analysis (TGA) of MOF-5 and COF-303@MOF-5.



**Synthesis of Janus COF-303@MOF-5.** Before the addition of MOF-5 precursor, the COF-303 microrods (3 mg) were placed with 2 mL DEF in a Pyrex vial and centrifuged for ten minutes. H<sub>2</sub>BDC (8.8 mg) and Zn(NO<sub>3</sub>)<sub>2</sub>·6H<sub>2</sub>O (41.6 mg) were subsequently added into the mixture. The mixture was heated in an 85 °C oven for 24 h to generate the Janus crystals of COF-303@MOF-5. The crystals were collected by centrifugation and washed with fresh DMF for 3 times.

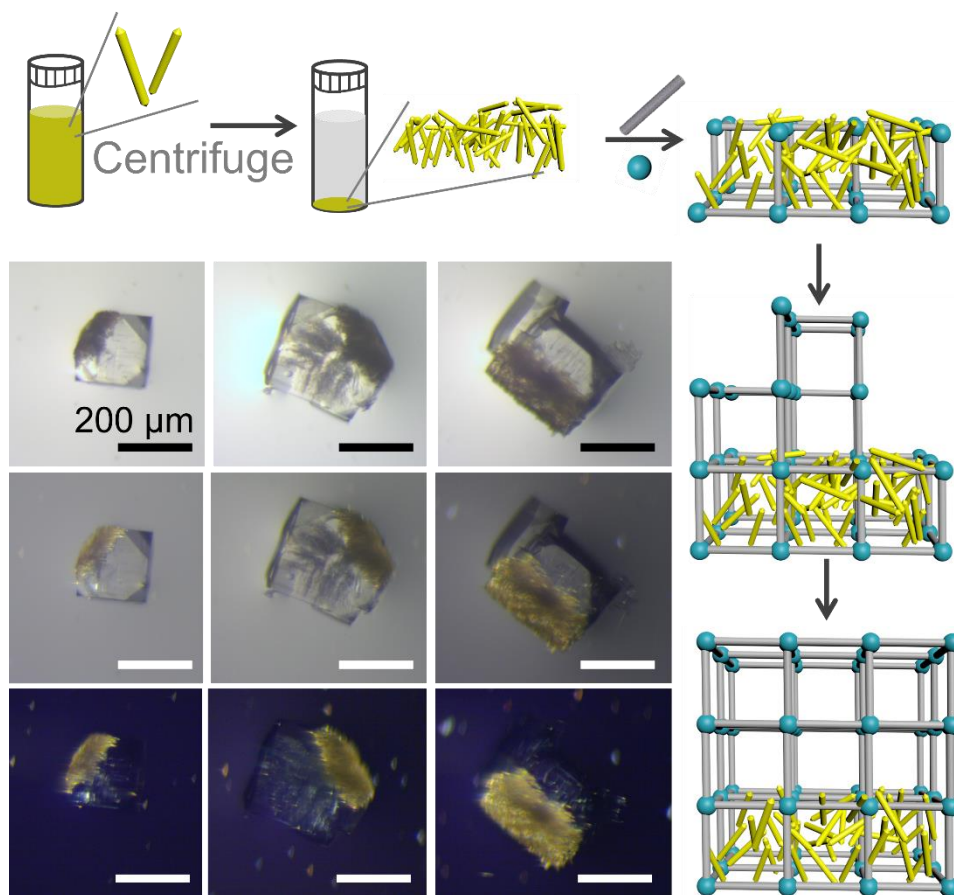

**Figure S12.** Models and optical images showing the preparation of Janus COF-303@MOF-5 crystals. The corresponding polarized optical images placed in between crossed polarizers are also provided to visualize the apportionment of COF microrods.

**Synthesis of MOF-5-Br.** MOF-5-Br was synthesized according to the literature with slight modification.<sup>3</sup>  $\text{Zn}(\text{NO}_3)_2 \cdot 6\text{H}_2\text{O}$  (41.6 mg),  $\text{H}_2\text{BDC-Br}$  (10 mg) and DEF (2 mL) were charged in a Pyrex vial. The mixture was heated in a 100 °C oven for 24 h to generate the cubic crystals of MOF-5-Br. The crystals of MOF-5-Br were collected by centrifugation and washed with fresh DMF for 3 times.

**Synthesis of COF-303@MOF-5-Br.** COF-303 (5 mg),  $\text{H}_2\text{BDC-Br}$  (10 mg),  $\text{Zn}(\text{NO}_3)_2 \cdot 6\text{H}_2\text{O}$  (41.6 mg) and DEF (2 mL) were charged in a Pyrex vial. The mixture was heated in an 85 °C oven for 24 h to generate the crystals of COF-303@MOF-5-Br. The crystals were collected by centrifugation and washed with fresh DMF for 3 times.

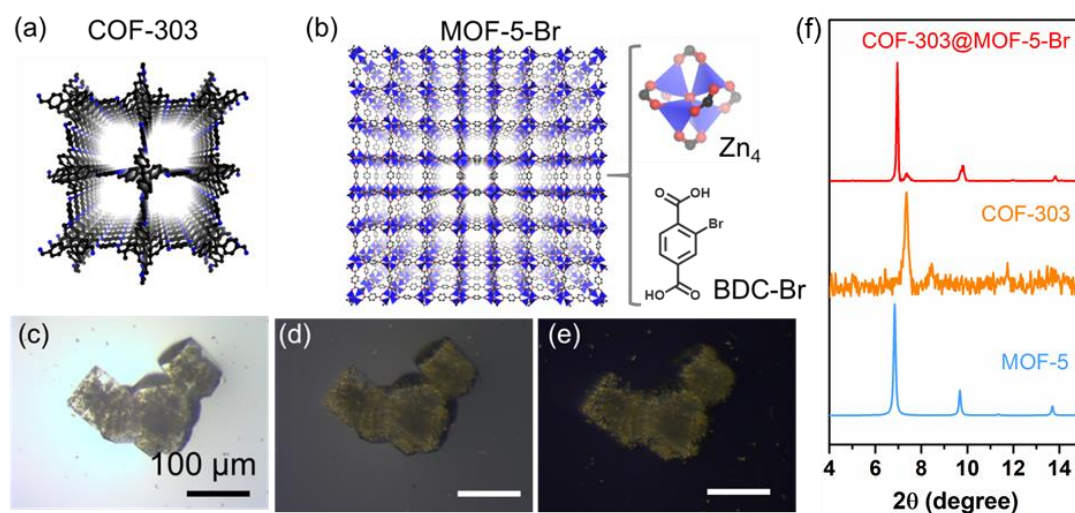

**Figure S13.** (a) The structure of COF-303 and (b) MOF-5-Br, (c-e) optical images and the corresponding polarized optical images, and (f) PXRD patterns of COF-303@MOF-5-Br crystals.

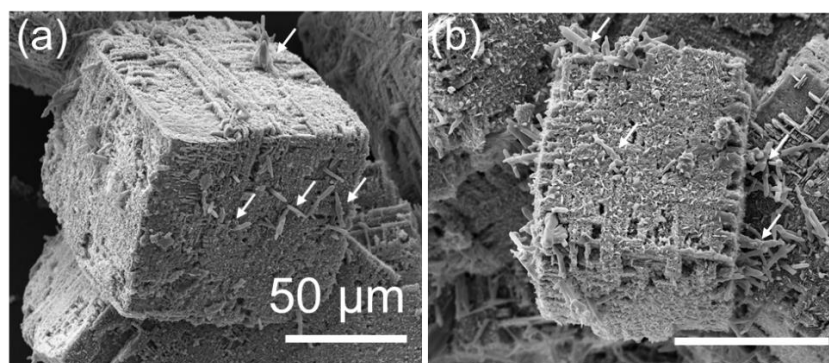

**Figure S14.** SEM images of COF-303@MOF-5-Br. The white arrows indicate the positions of COF-303 microrods.

**Synthesis of MOF-5-1,4-NDC.** MOF-5-1,4-NDC was synthesized according to the literature with slight modification.<sup>3</sup>  $\text{Zn}(\text{NO}_3)_2 \cdot 6\text{H}_2\text{O}$  (41.6 mg), 1,4- $\text{H}_2\text{NDC}$  (12 mg) and DEF (2 mL) were charged in a Pyrex vial. The mixture was heated in a 100 °C oven for 24 h to generate the cubic crystals of MOF-5-1,4-NDC. The crystals of MOF-5-1,4-NDC were collected by centrifugation and washed with fresh DMF for 3 times.

**Synthesis of COF-303@MOF-5-NDC.** COF-303 (5 mg), 1,4- $\text{H}_2\text{NDC}$  (12 mg),  $\text{Zn}(\text{NO}_3)_2 \cdot 6\text{H}_2\text{O}$  (41.6 mg) and DEF (2 mL) were charged in a Pyrex vial. The mixture was heated in an 85 °C oven for 24 h to generate the crystals of COF-303@MOF-5-NDC. The crystals were collected by centrifugation and washed with fresh DMF for 3 times.

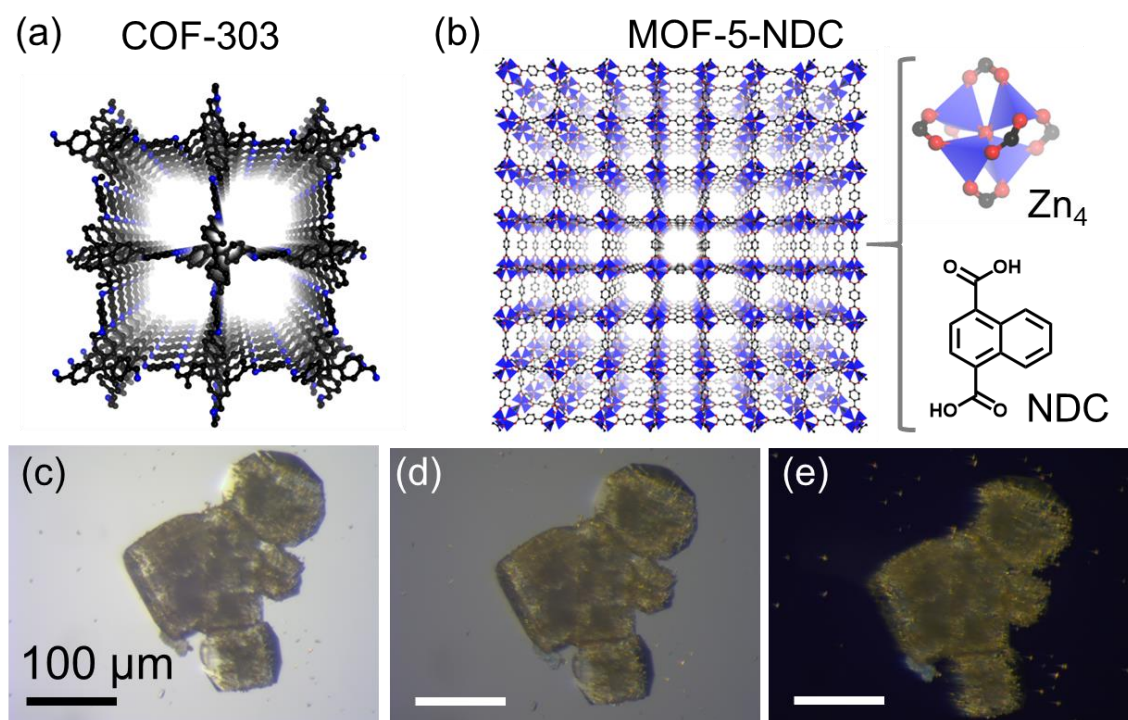

**Figure S15.** (a) The structure of COF-303 and (b) MOF-5-NDC, (c-e) optical images and the corresponding polarized optical images of COF-303@MOF-5-NDC crystals.



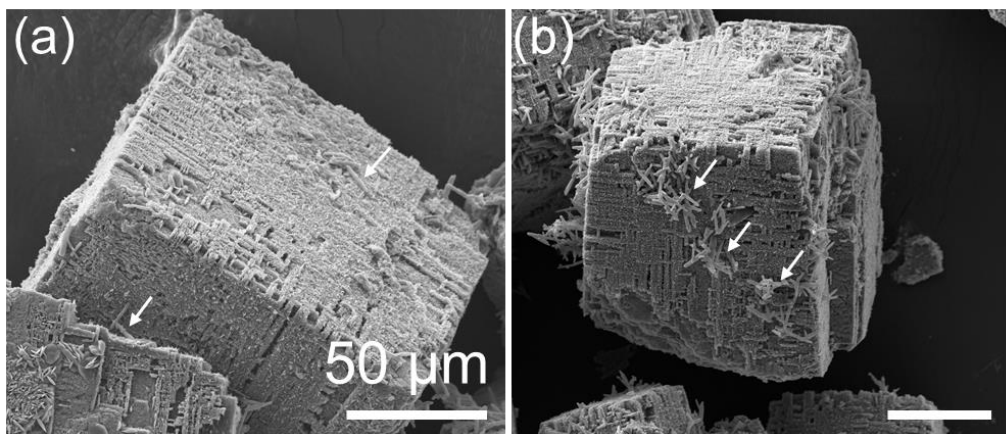

**Figure S16.** SEM images of COF-303@MOF-5-NDC. The white arrows indicate the positions of COF-303 microrods.

**Synthesis of MOF-5-BPDC.** MOF-5-BPDC was synthesized according to the literature with slight modification.<sup>2</sup>  $\text{Zn}(\text{NO}_3)_2 \cdot 6\text{H}_2\text{O}$  (31 mg),  $\text{H}_2\text{BPDC}$  (5 mg) and DEF (16 mL) were charged in a Pyrex vial. The mixture was heated in an 85 °C oven for 24 h to generate the cubic crystals of MOF-5-BPDC. The crystals of MOF-5-BPDC were collected by centrifugation and washed with fresh DMF for 3 times.

**Synthesis of COF-303@MOF-5-BPDC.** COF-303 (2 mg),  $\text{H}_2\text{BPDC}$  (5 mg),  $\text{Zn}(\text{NO}_3)_2 \cdot 6\text{H}_2\text{O}$  (31 mg) and DEF (16 mL) were charged in a Pyrex vial. The mixture was heated in an 85 °C oven for 24 h to generate the crystals of COF-303@MOF-5-BPDC. The crystals were collected by centrifugation and washed with fresh DMF for 3 times.

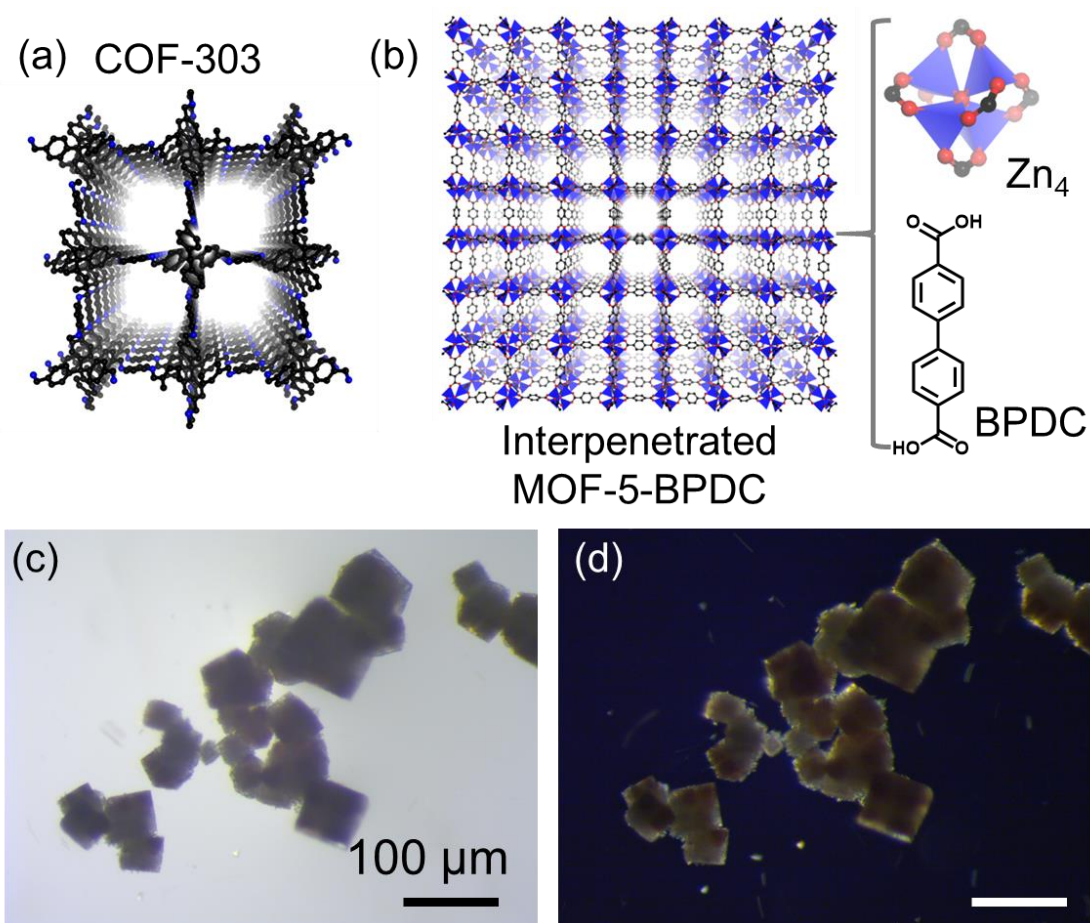

**Figure S17.** (a) The structure of COF-303 and (b) interpenetrated MOF-5-BPDC, (c-d) optical image and the corresponding polarized optical image of COF-303@interpenetrated MOF-5-BPDC crystals.

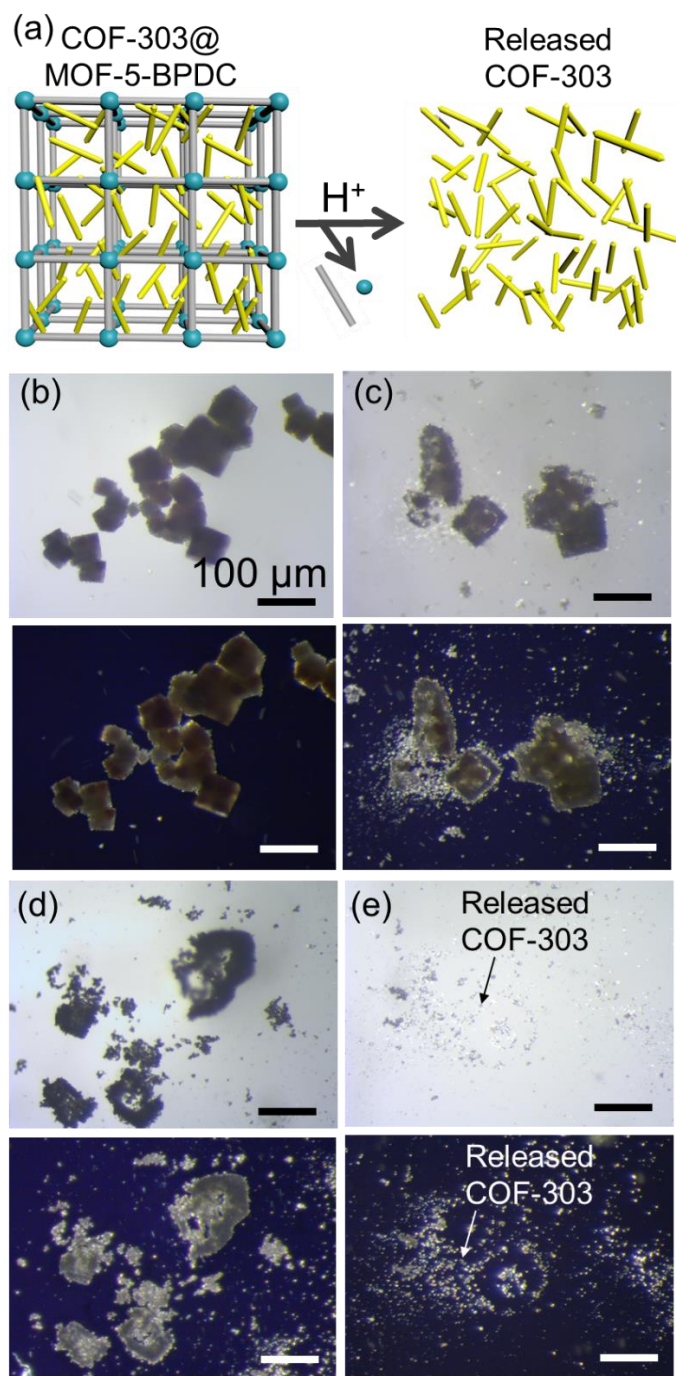

**Figure S18.** (a) Illustration of the decomposition of COF-303@MOF-5-BPDC under the treatment of HCl/DMF (1/5 v/v) solution; (b-e) Microscopic images of stepwise decomposition of COF-303@MOF-5-BPDC crystals under the treatment of HCl solution. (b) Before the addition of HCl solution, the COF-303@MOF-5-BPDC crystals displayed a multi-core-shell state; (c-e) after the acid addition, the MOF-5-BPDC crystals quickly dissolved from outside to inside, and released more acid-stable COF-303 crystals.

**Synthesis of MOF-177.** MOF-177 was synthesized according to the literature with slight modification.<sup>4</sup>  $\text{Zn}(\text{NO}_3)_2 \cdot 6\text{H}_2\text{O}$  (20 mg),  $\text{H}_3\text{BTB}$  (5 mg) and DEF (1 mL) were charged in a Pyrex vial. The mixture was heated in a 100 °C oven for 24 h to generate the crystals of MOF-177. The crystals of MOF-177 were collected by centrifugation and washed with fresh DMF for 3 times.

**Synthesis of COF-303@MOF-177.** COF-303 (2 mg),  $\text{Zn}(\text{NO}_3)_2 \cdot 6\text{H}_2\text{O}$  (20 mg),  $\text{H}_3\text{BTB}$  (5 mg) and DEF (1 mL) were charged in a Pyrex vial. The mixture was heated in a 100 °C oven for 24 h to generate the crystals of COF-303@MOF-177. The crystals were collected by centrifugation and washed with fresh DMF for 3 times.

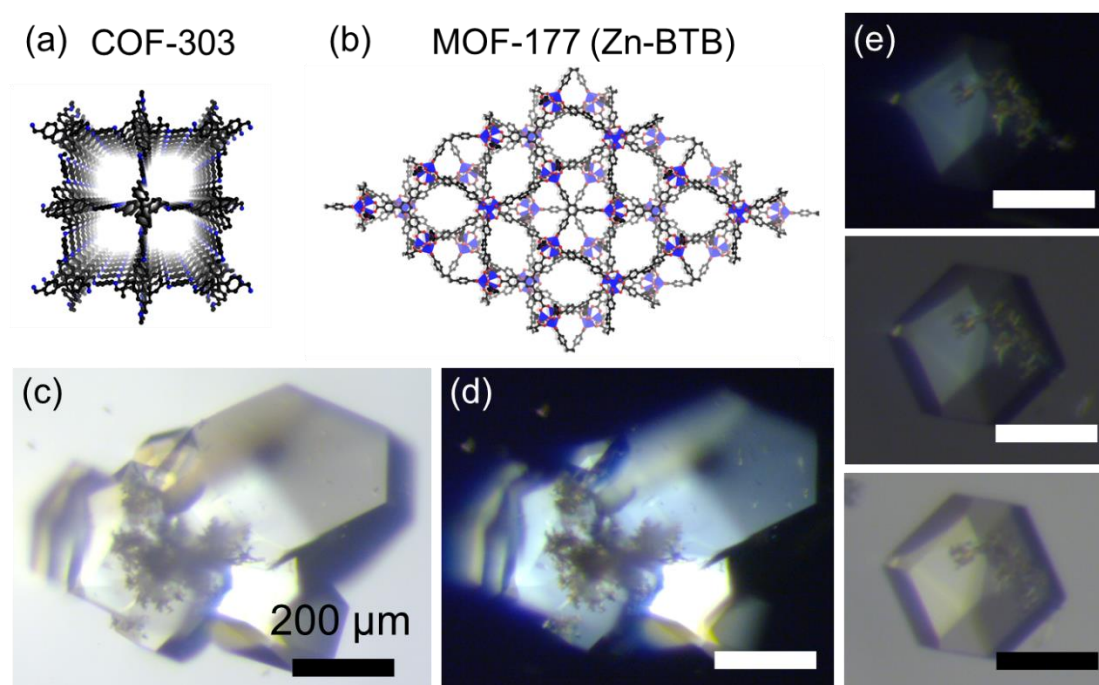

**Figure S19.** (a) The structure of COF-303 and (b) MOF-177, (c-e) optical image and the corresponding polarized optical image of COF-303@MOF-177 crystals.

**Synthesis of ZIF-8.** ZIF-8 was synthesized according to the literature with slight modification.<sup>5</sup>  $\text{Zn}(\text{NO}_3)_2 \cdot 4\text{H}_2\text{O}$  (0.210 g, 0.803 mmol) and 2-methylimidazole (H-MeIM) (0.060 g, 0.731 mmol) were dissolved in 18 mL DMF in a 20 mL vial. The vial was then capped and placed in a 120 °C oven for 48 h to yield polyhedral crystals. The crystals were then washed with fresh DMF for 3 times.

**Synthesis of COF-303@ZIF-8.** COF-303 (5 mg), 2-methylimidazole (H-mIM, 18 mg),  $\text{Zn}(\text{NO}_3)_2 \cdot 4\text{H}_2\text{O}$  (63 mg) and DMF (5.4 mL) were charged in a Pyrex vial. The mixture was heated in a 120 °C oven for 48 h to generate the crystals of COF-303@ZIF-8. The crystals were collected by centrifugation and washed with fresh DMF for 3 times.

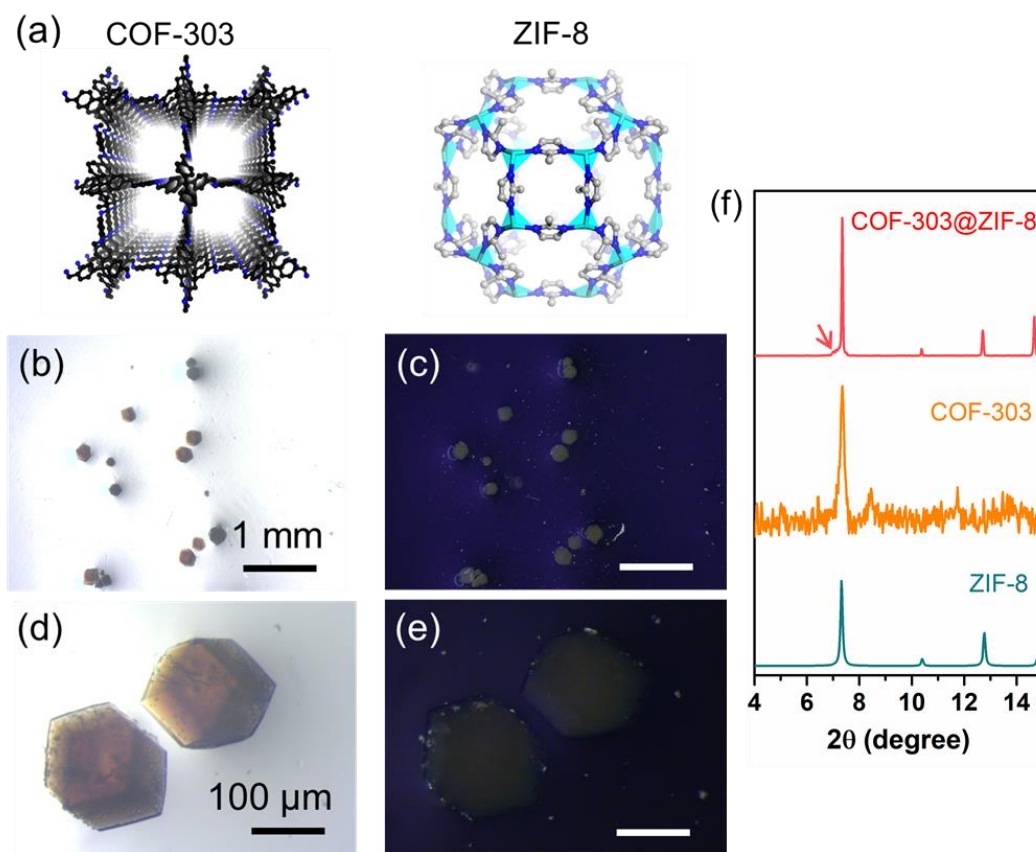

**Figure S20.** (a) The structure of COF-303 and ZIF-8, (b-e) optical image and the corresponding polarized optical image and (f) PXRD patterns of COF-303@ZIF-8 crystals.



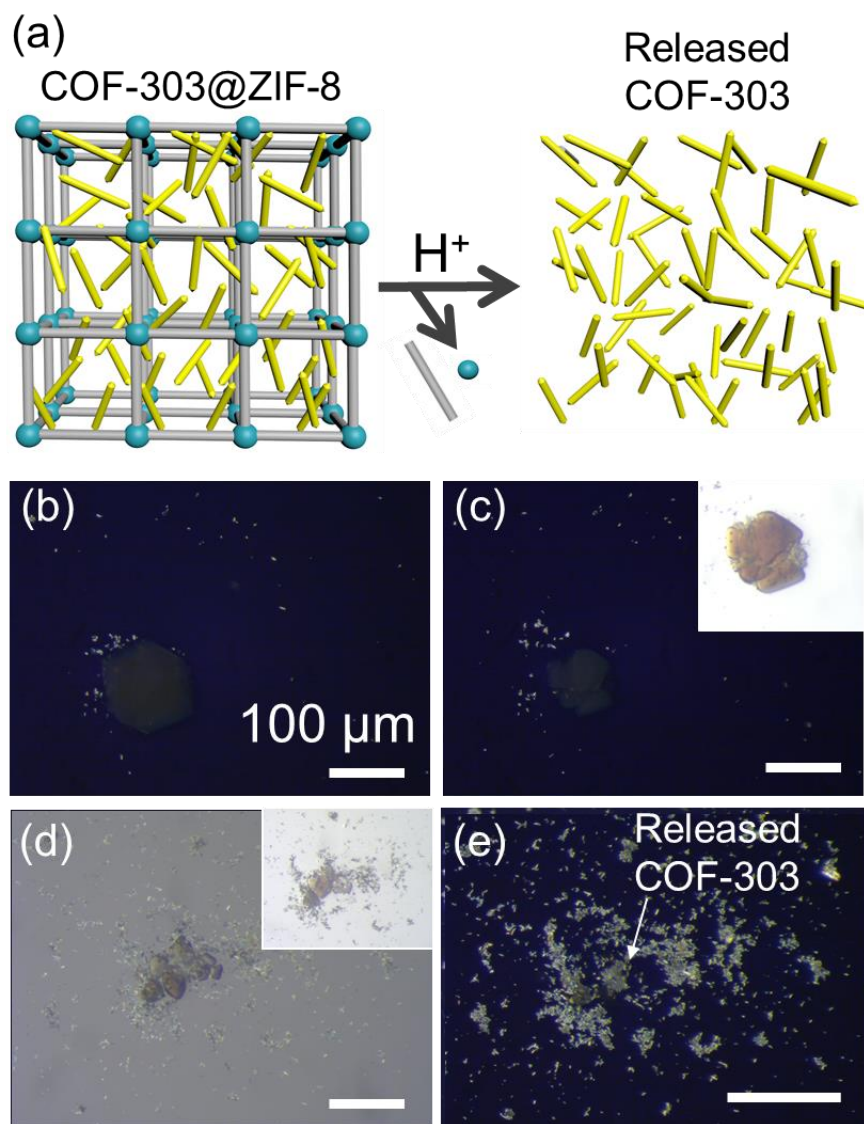

**Figure S21.** (a) Illustration of the decomposition of COF-303@ZIF-8 under the treatment of HCl/DMF (1/5 v/v) solution; (b-e) Microscopic images of stepwise decomposition of COF-303@ZIF-8 crystals under the treatment of HCl solution. (b) Before the addition of HCl solution, the COF-303@ZIF-8 crystals displayed a multi-core-shell state; (c-e) after the acid addition, the ZIF-8 crystals quickly dissolved from outside to inside, and released more acid-stable COF-303 crystals.

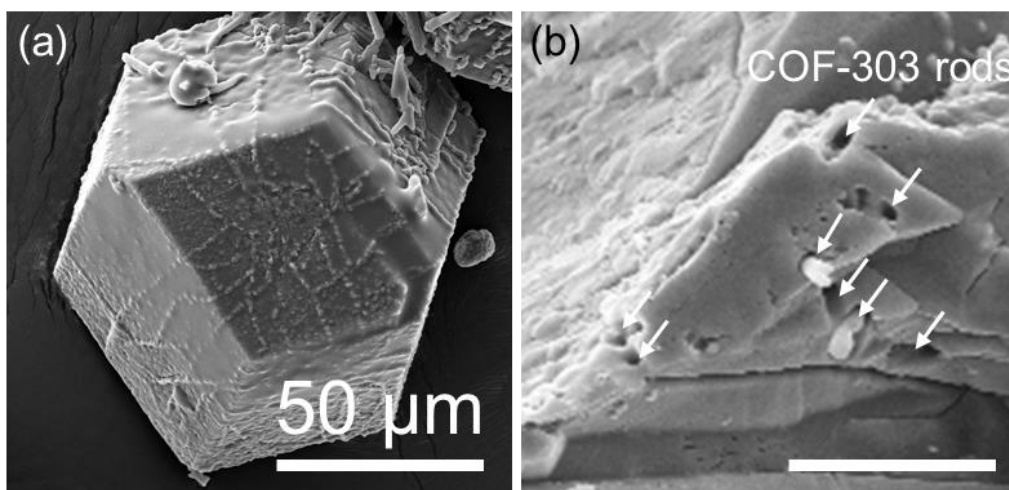

**Figure S22.** (a) SEM analysis of COF-303@ZIF-8, and (b) its internal structure with COF-303 microrods immobilized inside ZIF-8 crystals.



**Synthesis of UiO-67.** UiO-67 single crystals were synthesized according to the literature with slight modification.<sup>6</sup> ZrCl<sub>4</sub> (100 mg), BPDC (100 mg), TFA (2.0 mL) and DMF (15 mL) were charged in a Pyrex vial. The mixture was heated in 120 °C oven for 5 days. After cooling down to room temperature, the resulting single crystals UiO-67 was separated by centrifugation and washed several times with DMF.

**Synthesis of COF-303@UiO-67.** COF-303 (3 mg), ZrCl<sub>4</sub> (10 mg), BPDC (10 mg), TFA (0.2 mL) and DMF (1.5 mL) were charged in a Pyrex vial. The mixture was heated in 120 °C oven for 5 days. After cooling down to room temperature, the resulting COF-303@UiO-67 crystals were separated by centrifugation and washed several times with DMF.

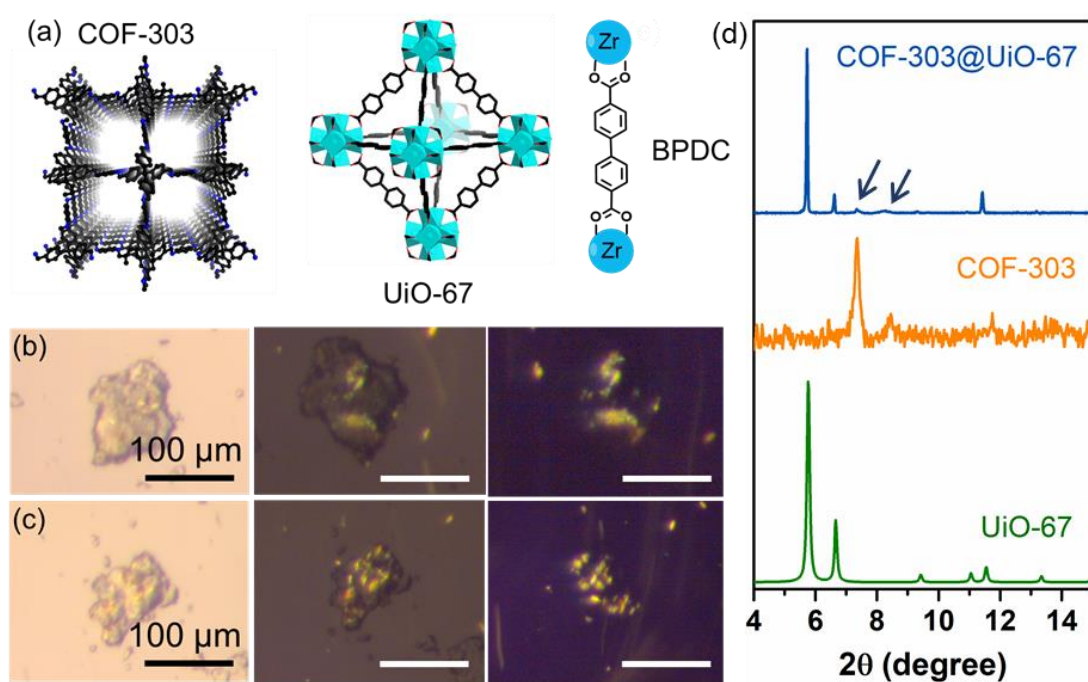

**Figure S23.** (a) The structure of COF-303 and UiO-67, (b-c) optical image and the corresponding polarized optical image and (d) PXRD patterns of COF-303@UiO-67 crystals.

**Synthesis of PCN-160.** PCN-160 single crystals were synthesized according to the literature with slight modification.<sup>7</sup> ZrCl<sub>4</sub> (100 mg), AZDC (100 mg), TFA (2.0 mL) and DMF (15 mL) were charged in a Pyrex vial. The mixture was heated in 120 °C oven for 5 days. After cooling down to room temperature, the resulting single crystals PCN-160 was separated by centrifugation and washed several times with DMF.

**Synthesis of COF-303@PCN-160.** COF-303 (3 mg), ZrCl<sub>4</sub> (10 mg), AZDC (10 mg), TFA (0.2 mL) and DMF (1.5 mL) were charged in a Pyrex vial. The mixture was heated in 120 °C oven for 5 days. After cooling down to room temperature, the resulting COF-303@PCN-160 crystals were separated by centrifugation and washed several times with DMF.

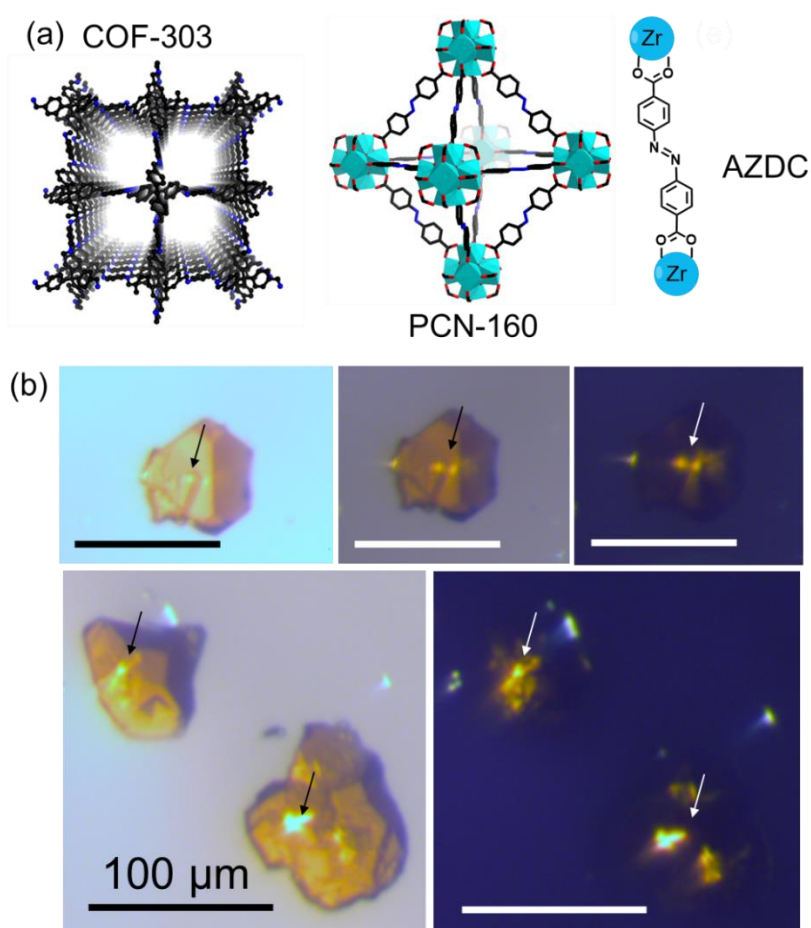

**Figure S24.** (a) The structure of COF-303 and PCN-160, (b) optical image and the corresponding polarized optical image of COF-303@PCN-160 crystals.

**Crystallization of COF-300.** Single-crystalline COF-300 was synthesized on the basis of a previous report.<sup>1</sup> A vial was charged with 12.0 mg terephthalaldehyde (BDA), 0.12 mL aniline and 0.5 mL of 1,4-dioxane, then 0.2 mL of 6 M aqueous acetic acid was added to the solution. 20.0 mg Tetrakis(4-aminophenyl)methane (TAM) dissolved in 0.5 mL 1,4-dioxane was then added. Then the mixture was allowed to further stand at ambient temperature for 15 days.

**Synthesis of COF-300@MOF-5.** COF-300 (3 mg), H<sub>2</sub>BDC (8.8 mg), Zn(NO<sub>3</sub>)<sub>2</sub>·6H<sub>2</sub>O (41.6 mg) and DEF (2 mL) were charged in a Pyrex vial. The mixture was heated in an 85 °C oven for 24 h to generate the crystals of COF-300@MOF-5. The crystals were collected by centrifugation and washed with fresh DMF for 3 times.

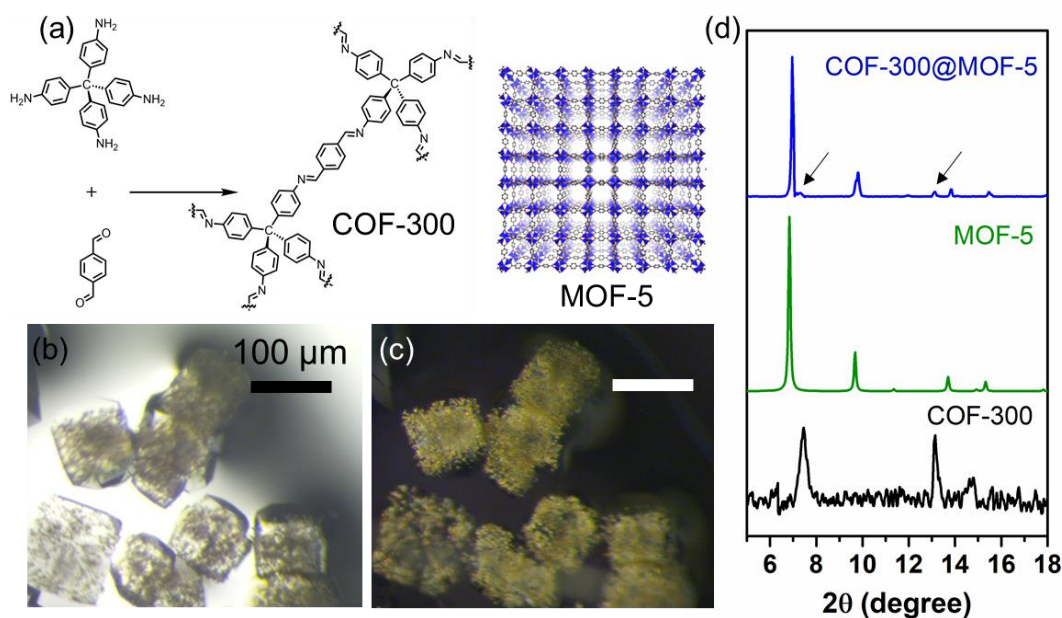

**Figure S25.** (a) The structure of COF-300 and MOF-5, (b-c) optical image and the corresponding polarized optical image of COF-300@MOF-5 crystals, and (d) PXRD patterns of COF-300@MOF-5.

**Synthesis of Zn-AzTPDC.** The ligands AzTPDC/CL4 and the MOF Zn-AzTPDC were prepared based on previous reports.<sup>8</sup> AzTPDC (28 mg, 0.065 mmol) and  $\text{Zn}(\text{NO}_3)_2 \cdot 6\text{H}_2\text{O}$  (57 mg, 0.19 mmol) were dissolved in 5 mL of N,N-diethylformamide (DEF) in a screw top vial. The vial was kept standing at 80 °C for 3 days. The solution was decanted, and yellow cubic crystals were repeatedly washed with DMF.

**Synthesis of COF-303@Zn-AzTPDC.** COF-303 (5 mg),  $\text{Zn}(\text{NO}_3)_2 \cdot 6\text{H}_2\text{O}$  (57 mg), AzTPDC (28 mg) and DEF (5.0 mL) were charged in a Pyrex vial. The mixture was heated in an 80 °C oven for 3 days to generate the crystals of COF-303@Zn-AzTPDC. The solution was decanted, and the crystals were repeatedly washed with DMF.

**Polymerization of hierarchical COF@polyMOF (COF-303@Zn-AzTPDC-CL4).** The polymerization was conducted on the basis of previous reports with slight modifications.<sup>8</sup> COF-303@Zn-AzTPDC was immersed in 5 mL of 0.1 M CL4 solution (DMF) in a screw top vial, and 250  $\mu\text{L}$  of saturated CuBr solution (DMF) was added to the mixture. The vial was kept standing at 80 °C for 3 days. The supernatant was decanted, and the cubic crystals, COF-303@Zn-AzTPDC-CL4, were repeatedly washed with DMF.

**Synthesis of hierarchical COF@polymer (COF-303@poly-AzTPDC-CL4).** The hydrolysis was conducted on the basis of previous reports with slight modifications.<sup>8</sup> COF-303@Zn-AzTPDC-CL4 was immersed in a mixed solvent of HCl/DMF (1:5, v/v) in a screw top vial. The vial was kept standing at room temperature for 3 h. The supernatant was decanted, and cubic crystals were repeatedly washed with DMF.

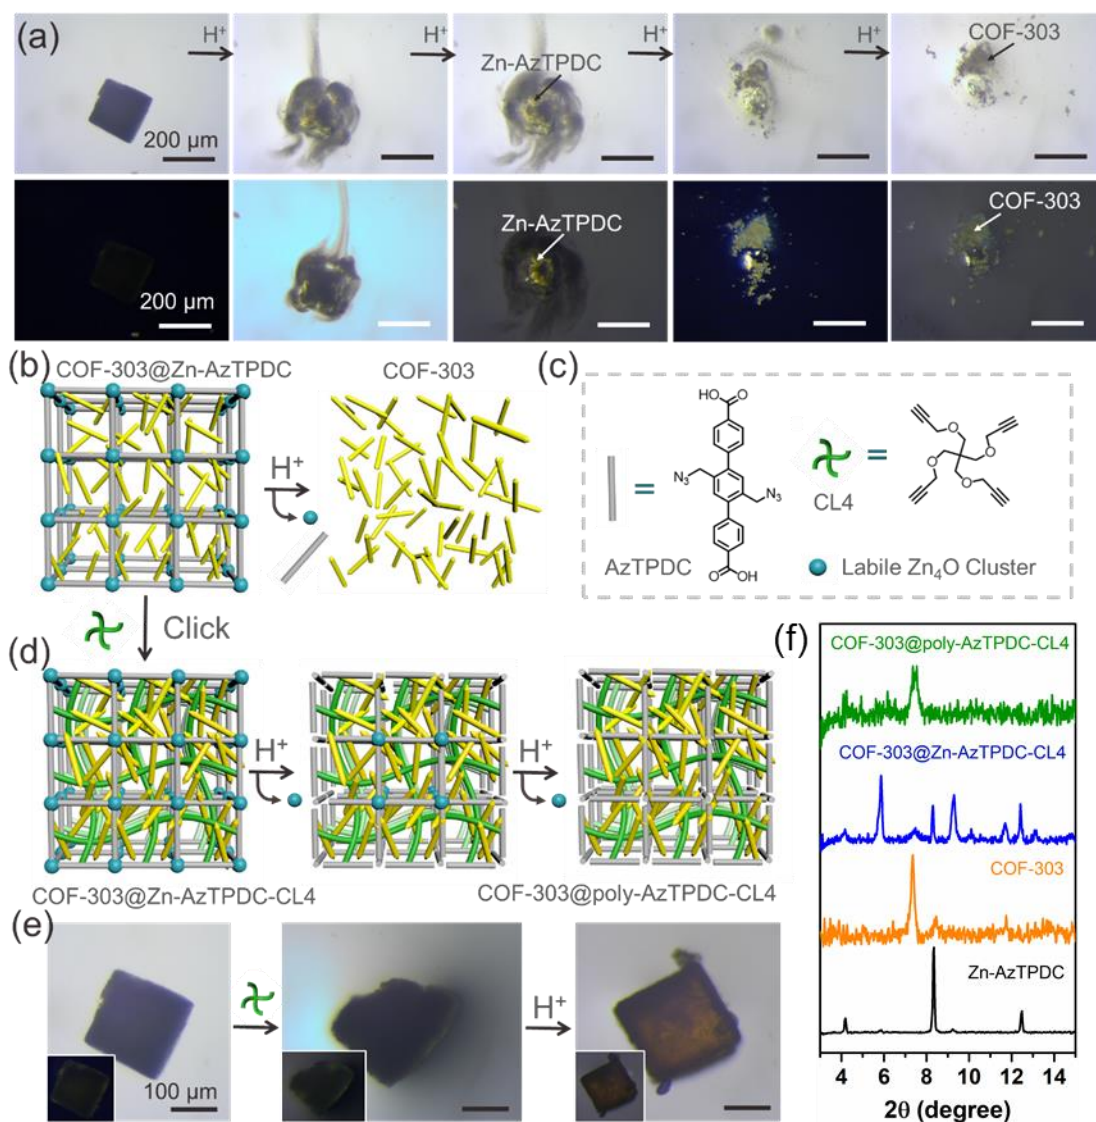

**Figure S26.** (a) Optical images and corresponding polarized optical images of COF-303@Zn-AzTPDC crystals treated with HCl/DMF (1/5, v/v), which shown fast decomposition of Zn-AzTPDC when in the absence of polymerization, while stable COF-303 survived after acid treatment. (b) Illustration of the decomposition of Zn-AzTPDC and preservation of COF-303 under acid treatment of COF-303@Zn-AzTPDC. (c) Basic building blocks AzTPDC, CL4 and labile  $\text{Zn}_4\text{O}$  clusters in ZnAzTPDC. (d) Illustration of the  $\text{Zn}_4\text{O}$  cluster removal in COF-303@Zn-AzTPDC. (e) Optical images and corresponding polarized optical images of COF-303@Zn-AzTPDC, COF-303@Zn-AzTPDC-CL4 and COF-303@poly-AzTPDC-CL4 crystals. (f) PXRD patterns of COF-303@Zn-AzTPDC-CL4 and COF-303@poly-AzTPDC-CL4.



**Synthesis of COF-303@PCN-160.** COF-303 (3 mg),  $\text{ZrCl}_4$  (10 mg), AZDC (10 mg), TFA (0.2 mL) and DMF (1.5 mL) were charged in a Pyrex vial. The mixture was heated in 120 °C oven for 5 days. After cooling down to room temperature, the resulting COF-303@PCN-160 crystals were separated by centrifugation and washed several times with DMF.

**Synthesis of (COF-303@PCN-160)@MOF-5.** COF-303@PCN-160 (5 mg),  $\text{H}_2\text{BDC}$  (8.8 mg), DEF (1 mL) were charged in a Pyrex vial. The mixture was heated in an 85 °C oven for 24 h.  $\text{Zn}(\text{NO}_3)_2 \cdot 6\text{H}_2\text{O}$  (41.6 mg) and DEF (1 mL) were further added into the vial. The mixture was heated in an 85 °C oven for 24 h to generate the crystals of (COF-303@PCN-160)@MOF-5. The crystals were collected by centrifugation and washed with fresh DMF for 3 times.

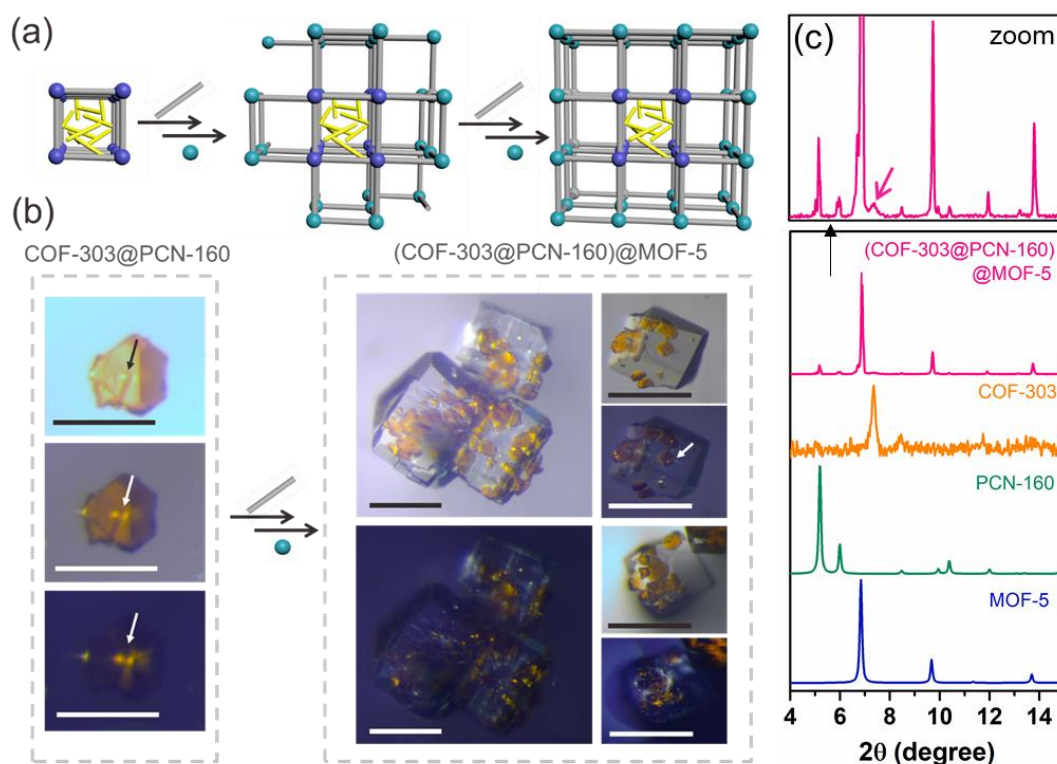

**Figure S27.** (a) Scheme illustration of the stepwise evolution from COF-303@PCN-160 to (COF-303@PCN-160)@MOF-5. (b) Optical images and corresponding polarized optical images of COF-303@PCN-160 and (COF-303@PCN-160)@MOF-5. (c) PXRD pattern of (COF-303@PCN-160)@MOF-5 and its components. Scale bar is 100  $\mu\text{m}$ .

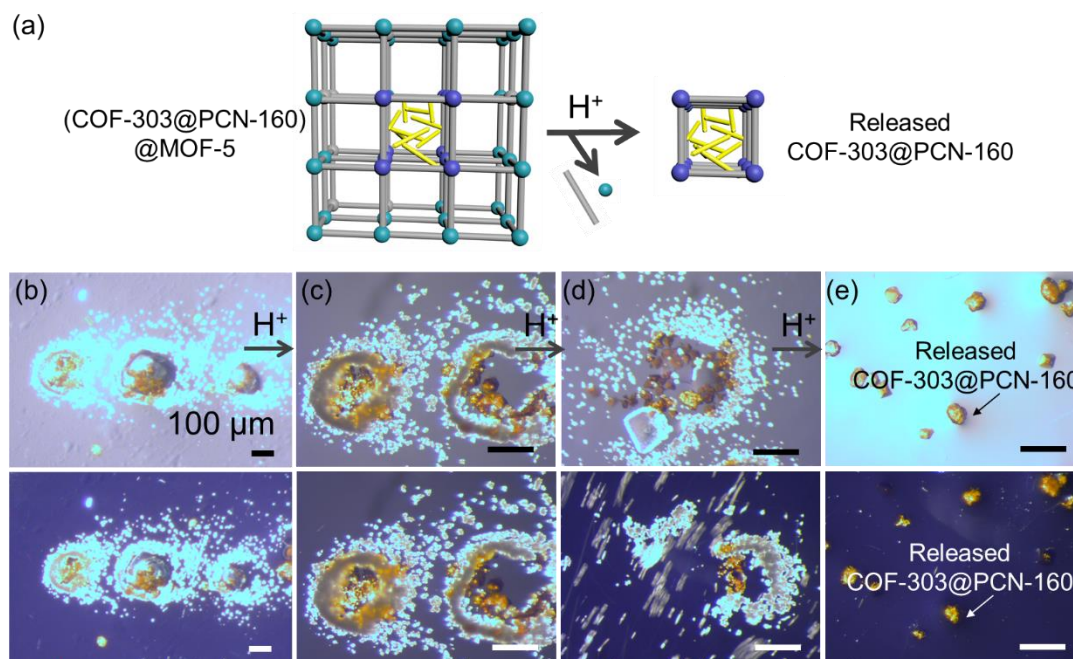

**Figure S28.** (a) Illustration of the decomposition of (COF-303@PCN-160)@MOF-5 under the treatment of HCl/DMF (1/5 v/v) solution; (b-e) Microscopic images of stepwise decomposition of (COF-303@PCN-160)@MOF-5 crystals under the treatment of HCl solution. Before the addition of HCl solution, the (COF-303@PCN-160)@MOF-5 crystals displayed a multi-core-shell state; after the acid addition, the core-shell COF-303@PCN-160 crystals were released and the shell MOF-5 quickly dissolved.



## References

1. Ma, T. Q.; Kapustin, E. A.; Yin, S. X.; Liang, L.; Zhou, Z. Y.; Niu, J.; Li, L. H.; Wang, Y. Y.; Su, J.; Li, J.; Wang, X. G.; Wang, W. D.; Wang, W.; Sun, J. L.; Yaghi, O. M., Single-crystal x-ray diffraction structures of covalent organic frameworks. *Science* **2018**, *361* (6397), 48-52.
2. Eddaoudi, M.; Kim, J.; Rosi, N.; Vodak, D.; Wachter, J.; O'Keeffe, M.; Yaghi, O. M., Systematic design of pore size and functionality in isorecticular MOFs and their application in methane storage. *Science* **2002**, *295* (5554), 469-472.
3. Deng, H. X.; Doonan, C. J.; Furukawa, H.; Ferreira, R. B.; Towne, J.; Knobler, C. B.; Wang, B.; Yaghi, O. M., Multiple Functional Groups of Varying Ratios in Metal-Organic Frameworks. *Science* **2010**, *327* (5967), 846-850.
4. Chae, H. K.; Siberio-Perez, D. Y.; Kim, J.; Go, Y.; Eddaoudi, M.; Matzger, A. J.; O'Keeffe, M.; Yaghi, O. M., A route to high surface area, porosity and inclusion of large molecules in crystals. *Nature* **2004**, *427* (6974), 523-527.
5. Park, K. S.; Ni, Z.; Cote, A. P.; Choi, J. Y.; Huang, R. D.; Uribe-Romo, F. J.; Chae, H. K.; O'Keeffe, M.; Yaghi, O. M., Exceptional chemical and thermal stability of zeolitic imidazolate frameworks. *P. Natl. Acad. Sci. USA* **2006**, *103* (27), 10186-10191.
6. Feng, L.; Yuan, S.; Zhang, L. L.; Tan, K.; Li, J. L.; Kirchon, A.; Liu, L. M.; Zhang, P.; Han, Y.; Chabal, Y. J.; Zhou, H. C., Creating Hierarchical Pores by Controlled Linker Thermolysis in Multivariate Metal-Organic Frameworks. *J. Am. Chem. Soc.* **2018**, *140* (6), 2363-2372.
7. Yuan, S. A.; Zou, L. F.; Qin, J. S.; Li, J. L.; Huang, L.; Feng, L. A.; Wang, X. A.; Bosch, M.; Alsalme, A.; Cagin, T.; Zhou, H. C., Construction of hierarchically porous metal-organic frameworks through linker labilization. *Nat. Comm.* **2017**, *8*, 15356.
8. Ishiwata, T.; Furukawa, Y.; Sugikawa, K.; Kokado, K.; Sada, K., Transformation of Metal-Organic Framework to Polymer Gel by Cross-Linking the Organic Ligands Preorganized in Metal-Organic Framework. *J. Am. Chem. Soc.* **2013**, *135* (14), 5427-5432.
